# Supplementary material for: Comparison of Students’ Self-Assessment and Simulated Patient Assessment in a Patient Counseling Evaluation and Perceived Importance of Communication Skills
Source: MDPI journal article supplement (doi:10.3390/pharmacy10060177), 2022-12-19
Supplement: s1 [file s1]

**Supplementary Materials**  
**Student Self-Administered Survey**

**Demographics**

1. What is your name? \_\_\_\_\_
2. What is your age in years? \_\_\_\_\_
3. What gender do you identify with?
  - a. Male
  - b. Female
  - c. Non-binary/other
  - d. Prefer not to answer
4. What race do you identify with?
  - a. American Indian or Alaska Native
  - b. Asian
  - c. Black or African American
  - d. Native Hawaiian or Other Pacific Islander
  - e. White or Caucasian
  - f. Other
  - g. Prefer not to answer
5. What ethnicity do you identify with?
  - a. Hispanic/Latino
  - b. Non-Hispanic/Latino
  - c. Prefer not to answer

**Self-Assessment of Performance in Communication in the Self-Care Counseling Evaluation**

After reviewing your evaluation video and reflection upon your performance, how would you self-assess your performance on the following elements of the Self-Care Counseling Evaluation?

| <b>Patient Counseling Components</b>                                                                                                                                                                                                                                                                                       | <b>Achievement of Outcome</b>                                                                   |
|----------------------------------------------------------------------------------------------------------------------------------------------------------------------------------------------------------------------------------------------------------------------------------------------------------------------------|-------------------------------------------------------------------------------------------------|
| <b>Practices Chunks and Checks For Understanding:</b> Consistently shares info tailored to the other person's needs and capacities, and checks for understanding (ask questions, express doubts) throughout the interaction.                                                                                               | <input type="checkbox"/> Yes<br><input type="checkbox"/> No                                     |
| <b>Demonstrates Empathy:</b> Recognizes and acknowledges emotional state of self, others, situation expressing care, understanding of the patient's experience and concern verbally and nonverbally.                                                                                                                       | <input type="checkbox"/> Yes<br><input type="checkbox"/> Partial<br><input type="checkbox"/> No |
| <b>Appropriate Non-Verbals:</b> Consistently demonstrates appropriate non-verbal behavior [incl. eye contact, facial expression, posture, position and movement, vocal rate, volume, tone, use of notes and computers without interference, used correct pronunciation, did not use fillers (uh, um) Conveyed confidence]. | <input type="checkbox"/> Yes<br><input type="checkbox"/> Partial<br><input type="checkbox"/> No |

|                                                                                                                         |                                                                                                 |
|-------------------------------------------------------------------------------------------------------------------------|-------------------------------------------------------------------------------------------------|
| <b>Used Patient-Friendly Language</b><br>Used plain language a patient would likely understand, avoided medical jargon. | <input type="checkbox"/> Yes<br><input type="checkbox"/> Partial<br><input type="checkbox"/> No |
|-------------------------------------------------------------------------------------------------------------------------|-------------------------------------------------------------------------------------------------|

Perceptions of Personal Communication

Please circle or highlight one of the options below for each question

1. I strongly believe that this course is helping me gain skills that I will need in order to be successful in my career  
*Strongly Disagree    Disagree    Agree    Strongly agree*
2. I find it challenging to communicate and connect with people.  
*Usually    Often    Sometimes    Rarely    Never*
3. I am often misunderstood.  
*Usually    Often    Sometimes    Rarely    Never*
4. People understand my questions, instructions, and ideas the first time I offer them.  
*Usually    Often    Sometimes    Rarely    Never*

On a scale from 1 to 5, **one** meaning “very unsatisfied” and **five** meaning “very satisfied” how would you rate your satisfaction with your performance in the encounter, based on the following elements?

5. Overall communication with standardized patient.

|                    |   |   |   |   |                  |
|--------------------|---|---|---|---|------------------|
| 1                  | 2 | 3 | 4 | 5 |                  |
| [Very Unsatisfied] |   |   |   |   | [Very Satisfied] |

6. Accuracy of clinical information provided.

|                    |   |   |   |   |                  |
|--------------------|---|---|---|---|------------------|
| 1                  | 2 | 3 | 4 | 5 |                  |
| [Very Unsatisfied] |   |   |   |   | [Very Satisfied] |

7. Ability to display empathy.

|                    |   |   |   |   |                  |
|--------------------|---|---|---|---|------------------|
| 1                  | 2 | 3 | 4 | 5 |                  |
| [Very Unsatisfied] |   |   |   |   | [Very Satisfied] |

8. Level of trust established.

|                    |   |   |   |   |                  |
|--------------------|---|---|---|---|------------------|
| 1                  | 2 | 3 | 4 | 5 |                  |
| [Very Unsatisfied] |   |   |   |   | [Very Satisfied] |

9. Depth of understanding regarding the patient’s concerns and/or needs.

|                    |   |   |   |   |                  |
|--------------------|---|---|---|---|------------------|
| 1                  | 2 | 3 | 4 | 5 |                  |
| [Very Unsatisfied] |   |   |   |   | [Very Satisfied] |

Perceptions of Communication Importance Overall and in the Profession of Pharmacy

*Please circle or highlight one of the options below for each question*

1. I believe that the development of soft skills, such as empathy, as an important aspect of being a pharmacist.  
*Strongly Disagree   Disagree   Agree   Strongly Agree*
2. I recognize the importance of communication skills to my future practice as a pharmacist  
*Strongly Disagree   Disagree   Agree   Strongly Agree*
3. I feel that communication is important to developing patient rapport and trust as a healthcare professional.  
*Strongly disagree   Disagree   Agree   Strongly Agree*

*In the questions below, please circle the statement in the comparison that you identify with most.*

4. I think feelings are important   OR   I think facts are important
5. It is important to communicate well   OR   It is important to be knowledgeable
6. I pride myself on being the best   OR   I pride myself on working hard
7. It is important to be heard   OR   It is important to listen
